# Supplementary material for: Flame-retardant finishing of cotton fabrics using DOPO functionalized alkoxy- and amido alkoxysilane
Source: Springer Nature journal article supplement (doi:10.1007/s10570-022-05033-3), 2023-01-04
Supplement: MOESM1 [file 23891124]

Supporting Information

## **Flame-retardant finishing of cotton fabrics using DOPO functionalized alkoxy- and amido alkoxysilane**

W. Ali, O. Zilke, D. Danielsiek, A. Salma, B. Assfour, V. Shabani, S. Caglar, H. M. Phan, L. Kamps, R. Wallmeier, Y. Feng, T. Textor, J. S. Gutmann and T. Mayer-Gall

*W. Ali (✉) · O. Zilke · D. Danielsiek · A. Salma · V. Shabani · H. M. Phan · L. Kamps · R. Wallmeier · J. S. Gutmann · T. Mayer-Gall (✉)*

*Deutsches Textilforschungszentrum Nord-West gGmbH, Adlerstr. 1, 47798 Krefeld, Germany*

E-mail: [ali@dtnw.de](mailto:ali@dtnw.de)

E-mail: [myer-gall@dtnw.de](mailto:myer-gall@dtnw.de)

*W. Ali (✉) · V. Shabani · S. Caglar · Y. Feng · J. S. Gutmann (✉) · T. Mayer-Gall*

*University of Duisburg-Essen, Institute of Physical Chemistry, Duisburg-Essen, Universitätsstraße 2, 45117 Essen, Germany*

E-mail: [wael.ali@uni-due.de](mailto:wael.ali@uni-due.de)

E-mail: [jochen.gutmann@uni-due.de](mailto:jochen.gutmann@uni-due.de)

*B. Assfour*

*Atomic Energy Commission, Department of Chemistry, P. O. Box, 6091, Damascus, Syria*

*T. Textor*

*Reutlingen University, Texoversum School of Textiles, Alteburgstraße 150, 72762 Reutlingen, Germany*

*J. S. Gutmann · T. Mayer-Gall*

*Center for Nanointegration Duisburg-Essen (CENIDE), Carl-Benz-Straße 199, 47048 Duisburg, Germany*

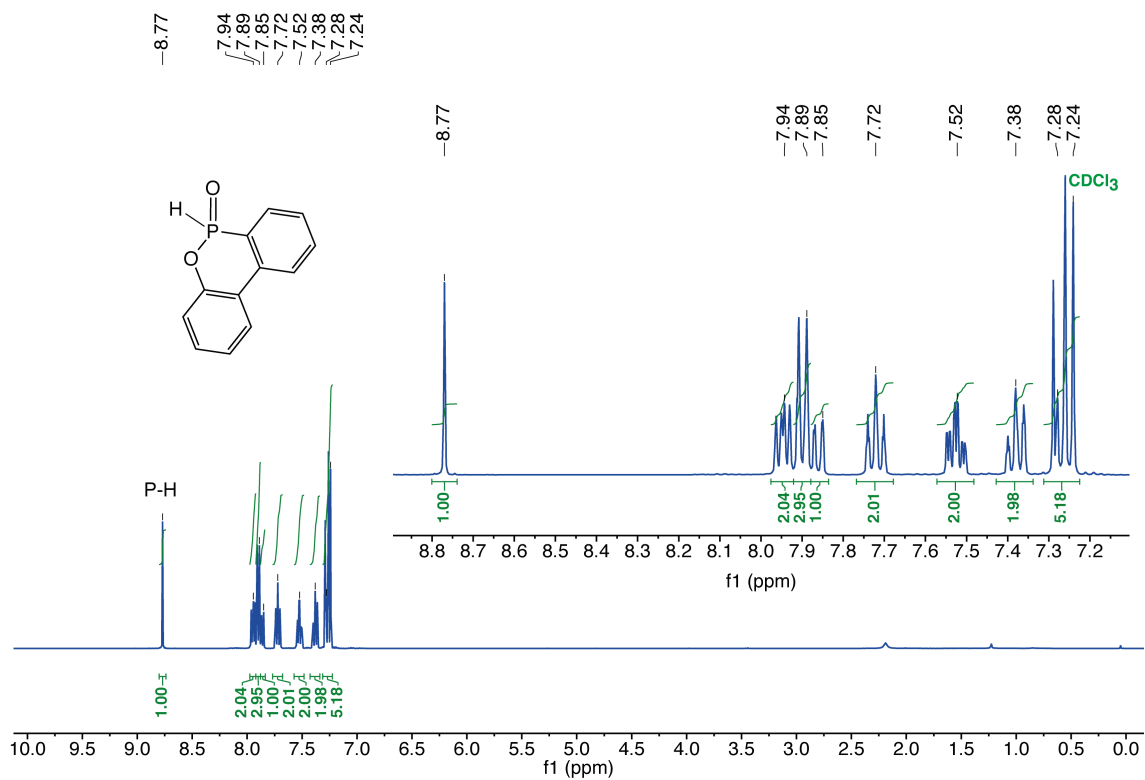

Fig. S1 <sup>1</sup>H-NMR spectrum of DOPO

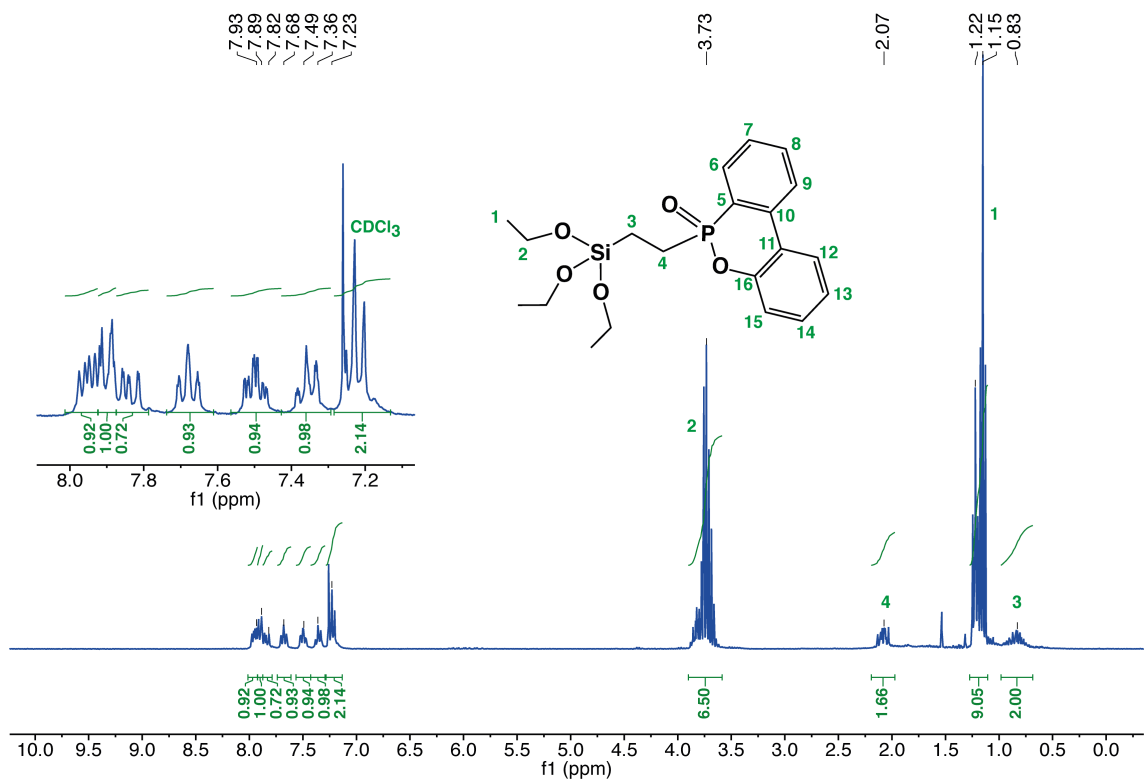

Fig. S2 <sup>1</sup>H-NMR spectrum of DOPO-ETES

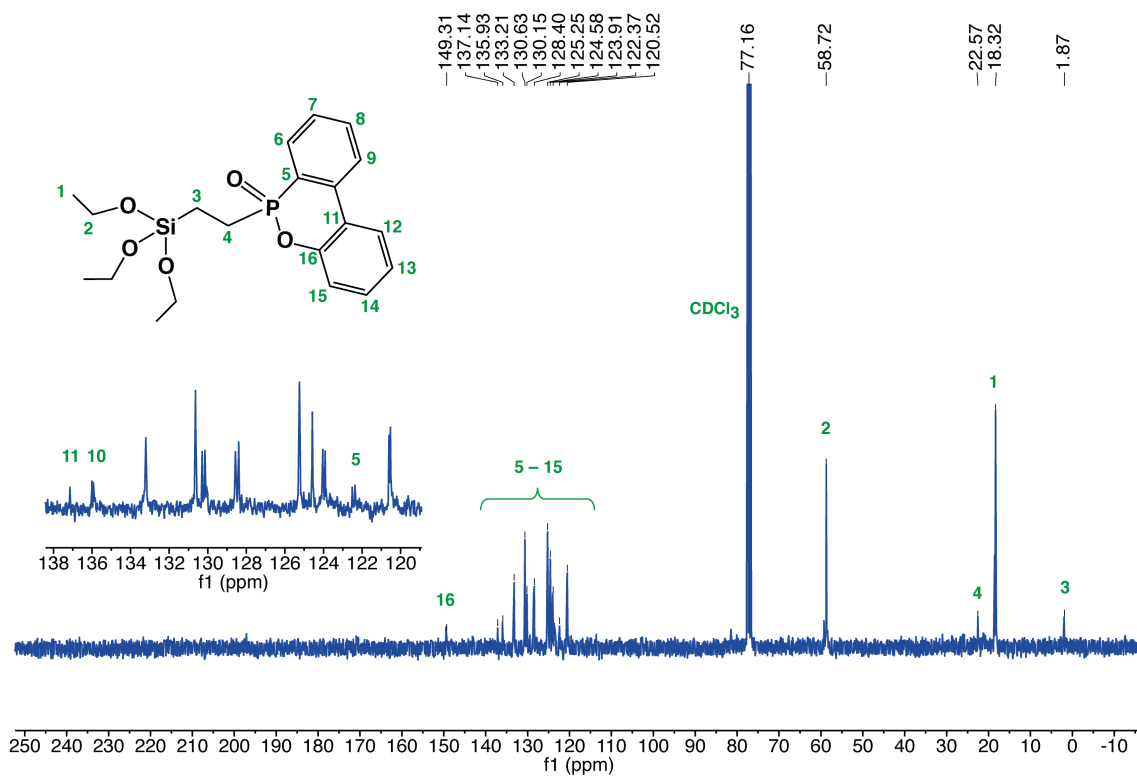

Fig. S3  $^{13}\text{C}$ -NMR spectrum of DOPO-ETES

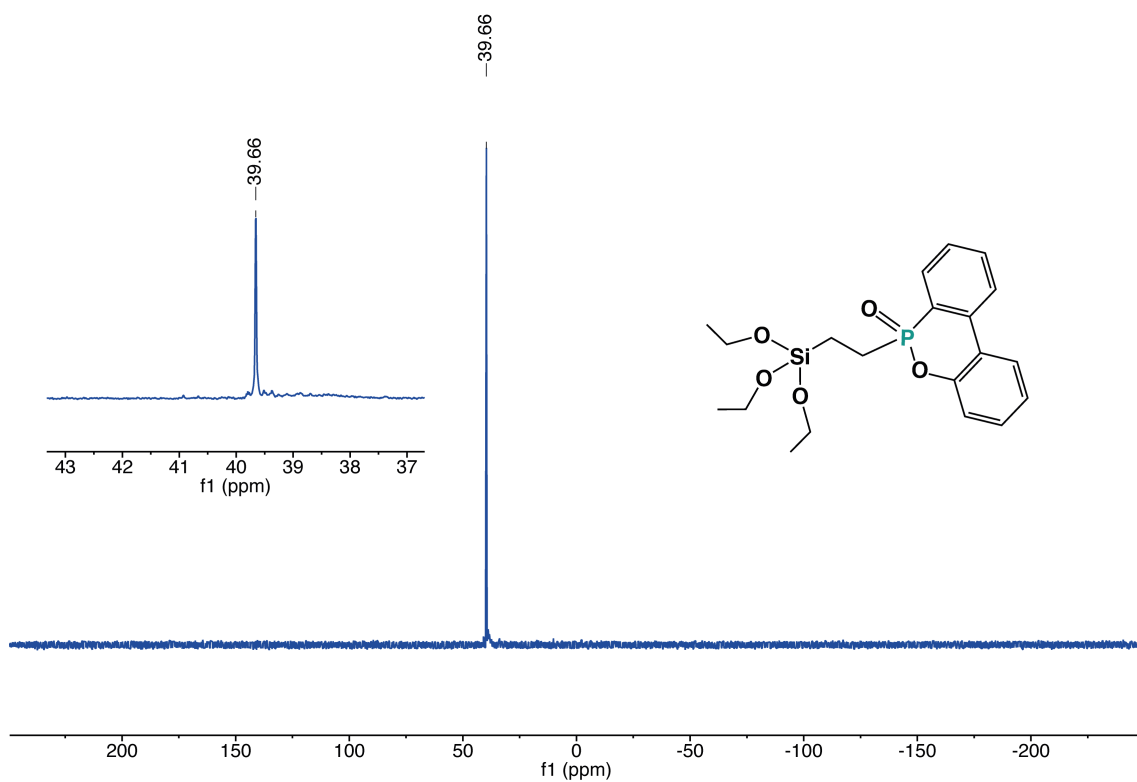

Fig. S4  $^{31}\text{P}$ -NMR spectrum of DOPO-ETES

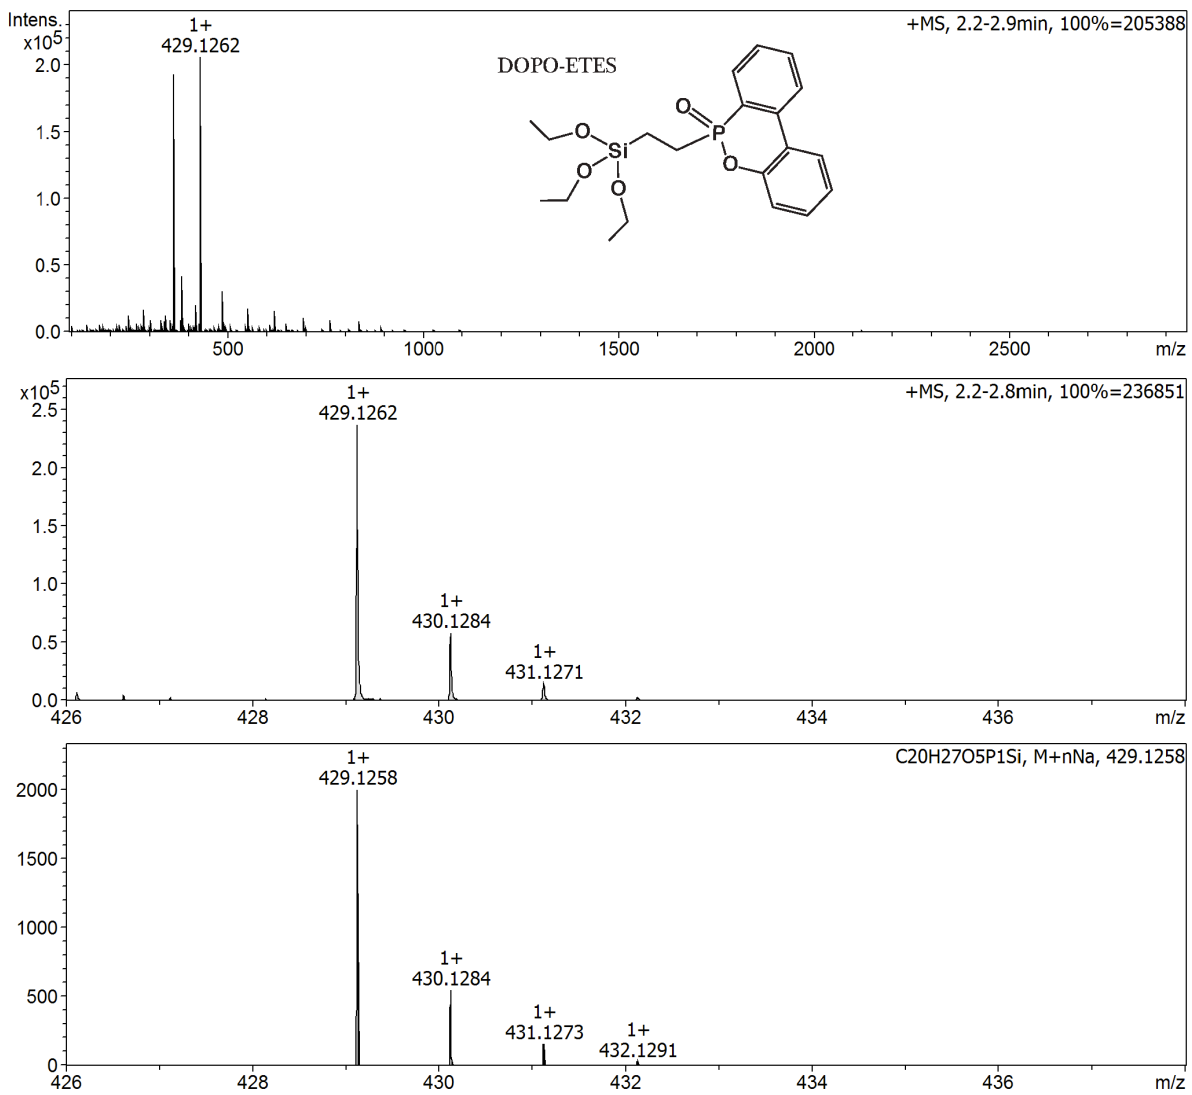

Fig. S5 High resolution MS spectrum of DOPO-ETES

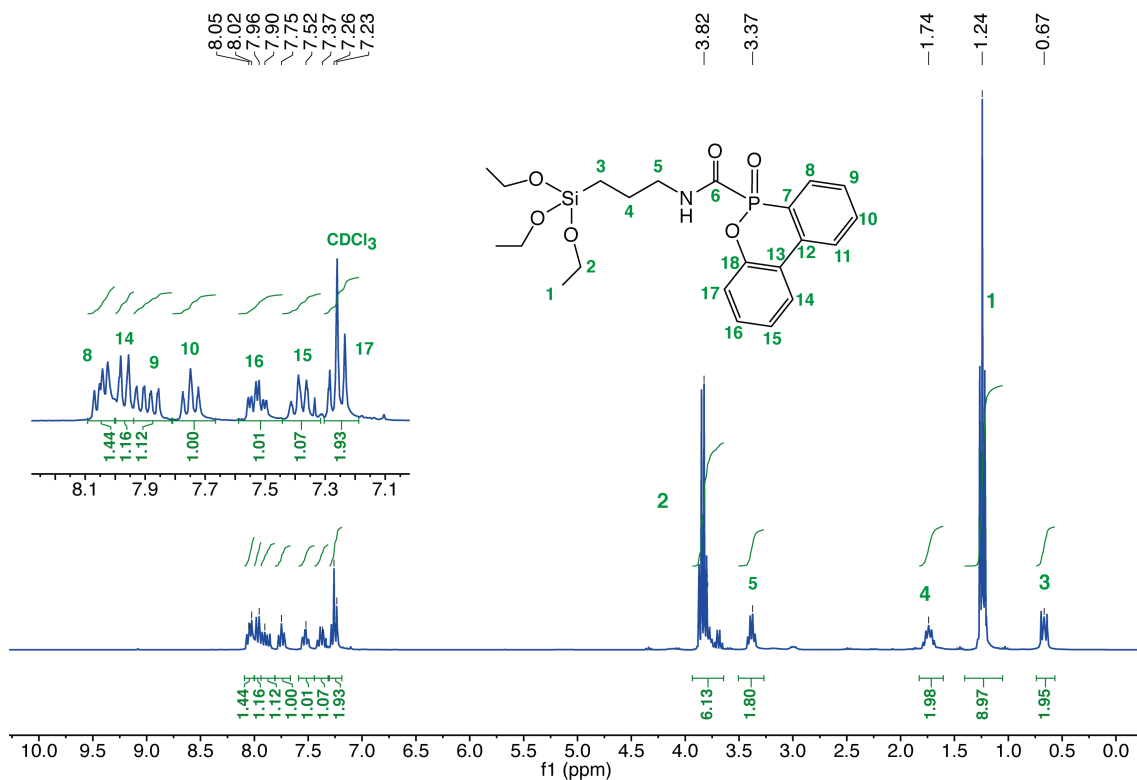

**Fig. S6** <sup>1</sup>H-NMR spectrum of DOPO-AmdPTES

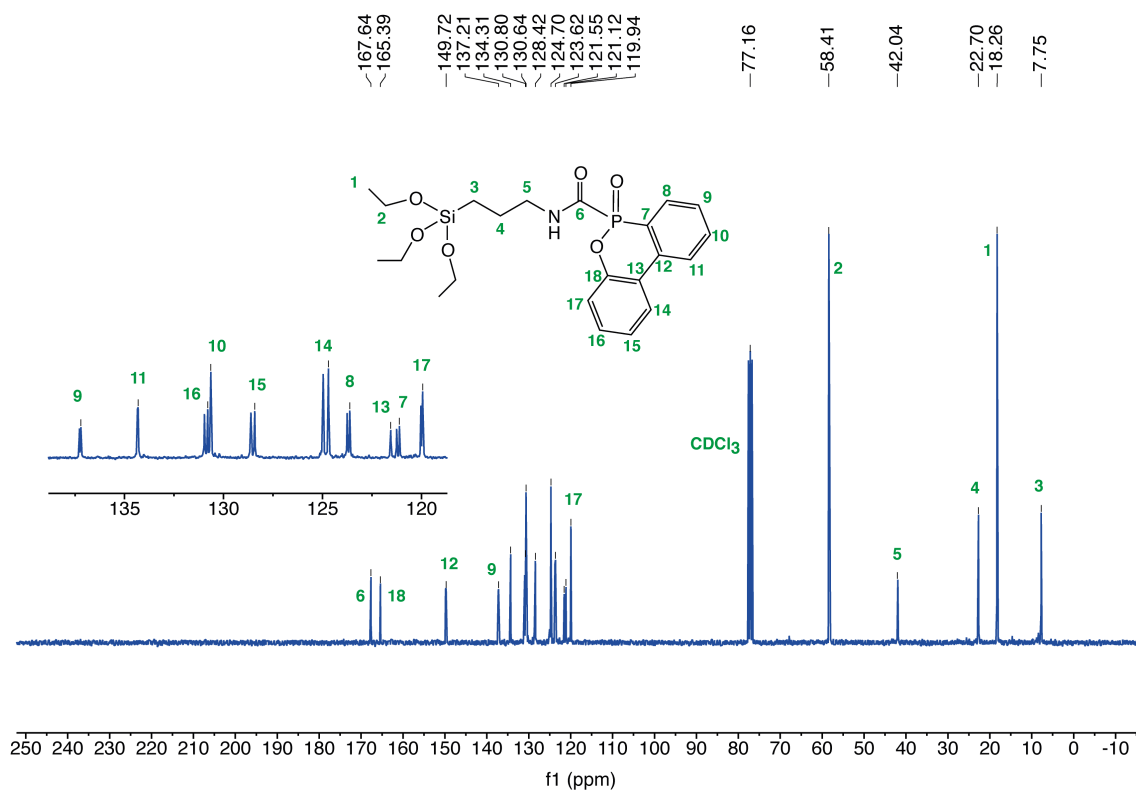

**Fig. S7** <sup>13</sup>C-NMR spectrum of DOPO-AmdPTES

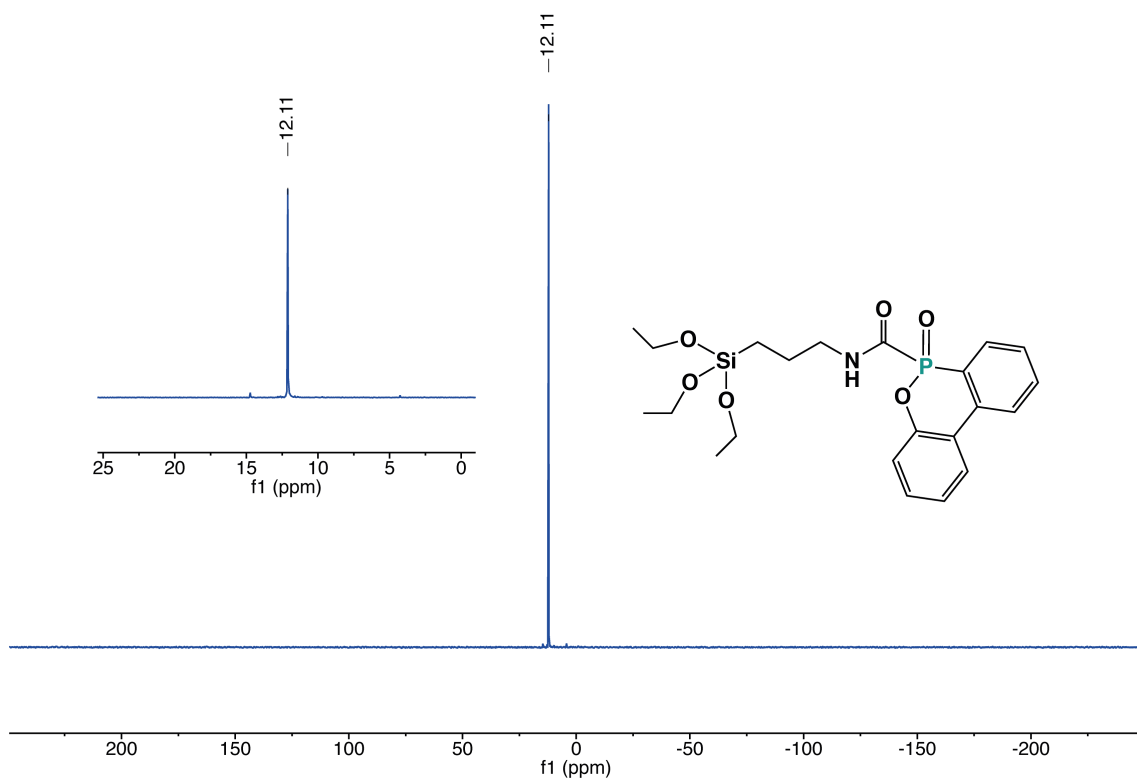

**Fig. S8** Fig. S4:  $^{31}\text{P}$ -NMR spectrum of DOPO-AmdPTES

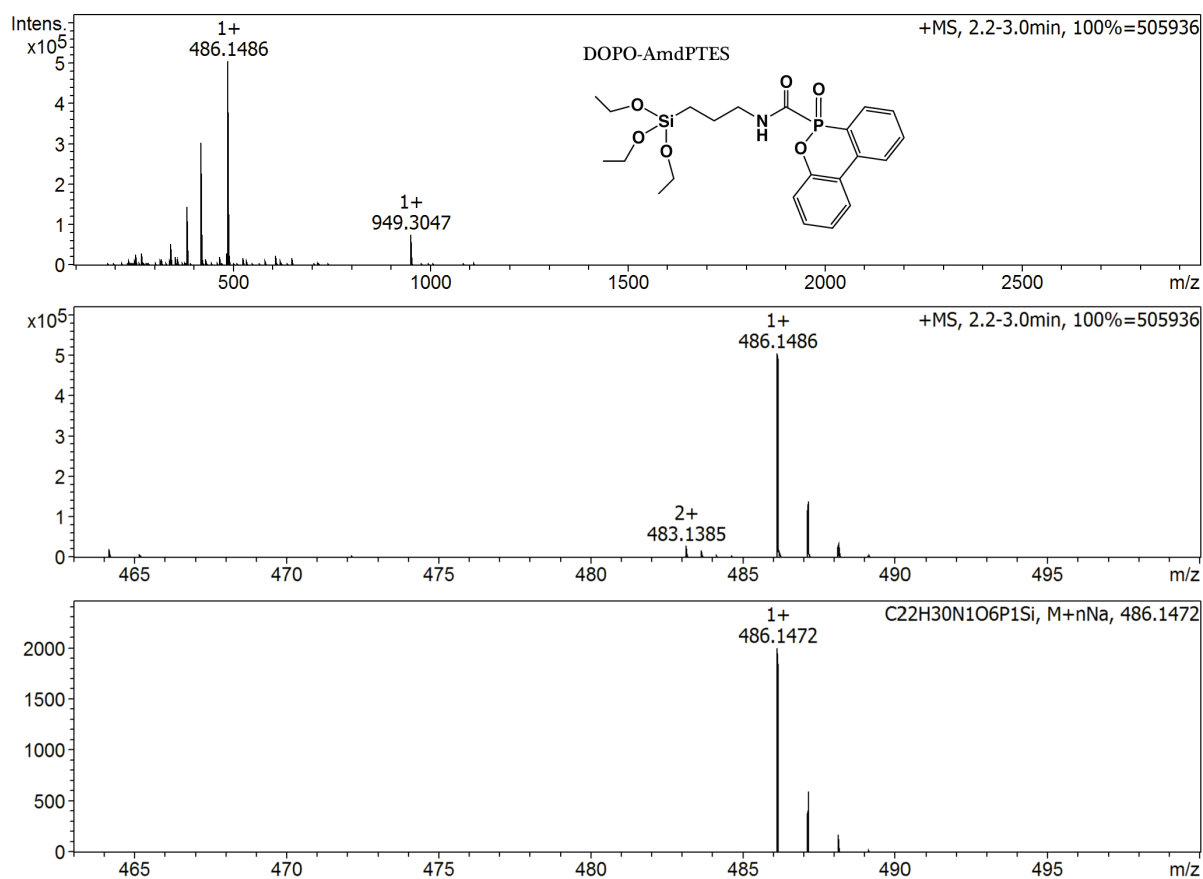

**Fig. S9** High resolution MS spectrum of DOPO-AmdPTES

**Table S1** Main identified pyrolysis products of untreated and treated cotton fabric obtained from Py-GC/MS at 700 °C

| No. | Compound Name             | Assigned structure                                                                  | Molecular weight<br>[g/mol] | Cotton (CO)    |               | CO/DOPO-ETES   |               | CO/DOPO-AmdPTES |               |
|-----|---------------------------|-------------------------------------------------------------------------------------|-----------------------------|----------------|---------------|----------------|---------------|-----------------|---------------|
|     |                           |                                                                                     |                             | Retention time | Relative Area | Retention time | Relative Area | Retention time  | Relative Area |
|     |                           |                                                                                     |                             | [min]          | [%]           | [min]          | [%]           | [min]           | [%]           |
| 1   | CO <sub>2</sub>           | O=C=O                                                                               | 44                          | 0.6            | 4.6           | 0.6            | 2.6           | 0.4             | 3.7           |
| 2   | Furan                     |    | 68                          | 1.5            | 2.4           | 1.5            | 1.7           | 1.3             | 0.7           |
| 3   | Acetic acid ethenyl ester |    | 86                          | 2.6            | 0.7           | –              | –             | –               | –             |
| 4   | Methylfuran               |    | 82                          | 2.8            | 0.3           | 2.8            | 0.8           | 2.7             | 0.5           |
| 5   | Acetic Acid               |    | 60                          | 5.5            | 3.1           | 5.5            | 0.8           | 5.5             | 0.9           |
| 6   | Hydroxyacetone            |    | 74                          | 6.3            | 2.7           | 6.3            | 0.6           | –               | –             |
| 7   | Triethylamine             |  | 101                         | –              | –             | –              | –             | 6.7             | 0.7           |
| 8   | 2-Furfural                |  | 96                          | 8.9            | 0.9           | 8.8            | 1.2           | 8.8             | 1.7           |
| 9   | 2-Furanmethanol           |  | 98                          | 9.2            | 0.9           | –              | –             | –               | –             |
| 10  | 5-Methylfuran-2(3H)-one   |  | 98                          | 10.4           | 1.5           | 10.4           | 0.9           | 10.4            | 0.3           |
| 11  | Levoglucosenone           |  | 126                         | –              | –             | 13.7           | 1.1           | 13.8            | 20            |



|          |                                              |                                                                                     |     |      |      |              |          |      |      |
|----------|----------------------------------------------|-------------------------------------------------------------------------------------|-----|------|------|--------------|----------|------|------|
| 12       | 1,4:3,6-Dianhydro- $\alpha$ -d-glucopyranose |    | 144 | 15.3 | 0.6  | 15.2         | 0.9      | 15.3 | 2.9  |
| 13       | 5-Hydroxymethylfurfural                      |    | 126 | 15.4 | 2.3  | 15.4         | 3.6      | 15.3 | 2    |
| 14       | 2-Hydroxy-6,8-dioxabicyclo[3.2.1]octan-4-one |    | 144 | 16.6 | 4.5  | 16.6         | 5.6      | 16.6 | 3.3  |
| 15       | Biphenyl                                     |    | 154 | –    | –    | 17.9         | 0.4      | 17.9 | 1    |
| 16       | Levogluconan                                 |    | 162 | 19.3 | 31.3 | 19.5         | 35.3     | 19.3 | 21.4 |
| 17       | o-Hydroxybiphenyl                            |    | 170 | –    | –    | 19.7         | 1.0      | 19.7 | 3.2  |
| 18       | 1,6-Anhydro- $\beta$ -D-glucofuranose        |    | 162 | –    | –    | 20.5         | 2.21     | 20.4 | 2.1  |
| 19       | 1H-Phenylene                                 |   | 166 | –    | –    | 20.8         | 1.1      | 20.8 | 1.9  |
| 20       | 9-Methyl-9H-fluorene                         |  | 180 | –    | –    | 21           | 0.6      | 21   | 0.3  |
| 21<br>22 | Phenanthrene/ Anthracene                     |  | 178 | –    | –    | 22.5<br>23.2 | 1<br>1.8 | 23.2 | 0.5  |
| 23       | DOPO                                         |  | 216 | –    | –    | –            | –        | 27.2 | 0.5  |

|    |               |                                                                                   |     |   |   |      |     |      |     |
|----|---------------|-----------------------------------------------------------------------------------|-----|---|---|------|-----|------|-----|
| 24 | Methyl-DOPO   | 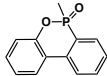 | 230 | - | - | 27.7 | 1   | 27.7 | 1   |
| 25 | Ethylene-DOPO |  | 242 | - | - | 28.3 | 0.6 | -    | -   |
| 26 | Ethyl-DOPO    |  | 244 | - | - | 28.6 | 4.1 | -    | -   |
| 27 | Formyl-DOPO   |  | 244 | - | - | -    | -   | 28.6 | 0.5 |
